# Supplementary material for: A magnetically separable photocatalyst based on nest-like γ-Fe2O3/ZnO double-shelled hollow structures with enhanced photocatalytic activity
Source: Royal Society of Chemistry journal article supplement (doi:10.1039/c1nr11114k), 2011-11-09
Supplement: c1nr11114k.pdf [file c1nr11114k.pdf]

## Electronic supplementary information

---

### A magnetically separable photocatalyst based on nest-like $\gamma$ -Fe<sub>2</sub>O<sub>3</sub>/ZnO double-shelled hollow structures with enhanced photocatalytic activity

Yu Liu,<sup>a</sup> Le Yu,<sup>b</sup> Yong Hu,<sup>\*a</sup> Changfa Guo,<sup>a</sup> Fumin Zhang,<sup>a</sup> and Xiong Wen (David) Lou<sup>\*b</sup>

<sup>a</sup> Institute of Physical Chemistry, Zhejiang Normal University, Jinhua, 321004, P.R.China; E-mail: [yonghu@zjnu.edu.cn](mailto:yonghu@zjnu.edu.cn)

<sup>b</sup> School of Chemical and Biomedical Engineering, Nanyang Technological University, 70 Nanyang Drive, Singapore, 639798, Singapore; E-mail: [xwlou@ntu.edu.sg](mailto:xwlou@ntu.edu.sg)

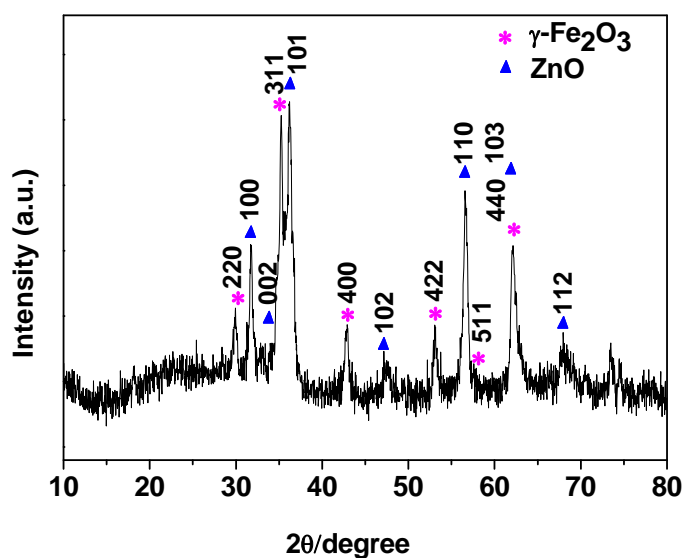

**Figure S1.** XRD pattern of the magnetic photocatalyst after the photocatalytic test.

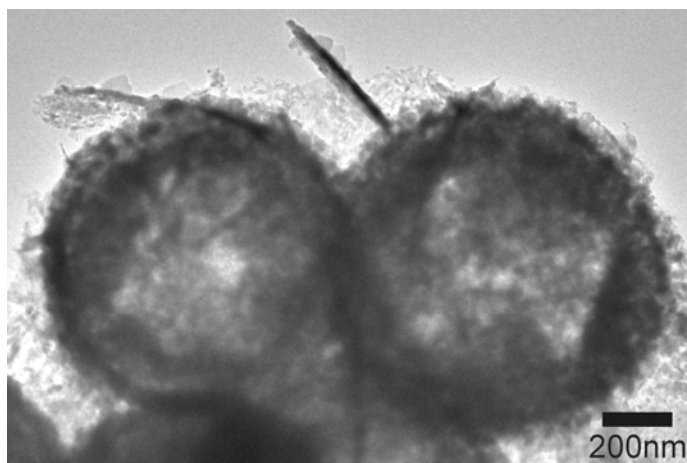

**Figure S2.** TEM image of the magnetic photocatalyst after the photocatalytic test. From the image, there is no significant structural alteration after the photocatalytic test, indicating good chemical stability of the photocatalyst.

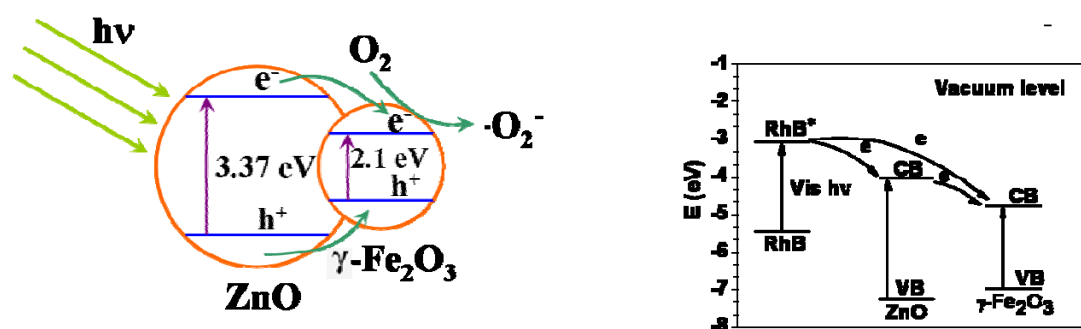

**Scheme S1.** Schematic diagram representing the charge-transfer process in  $\gamma\text{-Fe}_2\text{O}_3/\text{ZnO}$  heterostructure under direct excitation of electrons from the valence band (left) or excitation of dye molecules (e.g., RhB) by visible light. The conduction band energy of ZnO is higher than that of the  $\gamma\text{-Fe}_2\text{O}_3$ ,  $\gamma\text{-Fe}_2\text{O}_3$  act as a sink for the photogenerated electrons. It is reported that the Fe(III) in  $\text{Fe}_2\text{O}_3$  can be easily reduced to Fe(II). Hence, it is deduced that the electrons in the conduction band of ZnO in the presence of  $\text{Fe}_2\text{O}_3$  can be easily accepted by  $\text{Fe}_2\text{O}_3$ , which results in the formation of Fe(II). These accumulated electrons in the conduction band of  $\text{Fe}_2\text{O}_3$  will then be transferred to the molecular oxygen adsorbed on the surface of mixed semiconductor systems. [see Ref. 30. S. Sakthivel, S. U. Geissen, D. W. Bahnemann, V. Murugesan and A. Vogelpohl, *J. Photochem. Photobiol. A: Chem.*, 2002, **148**, 283.]
